# Supplementary material for: Engineering and Modulating Functional Cyanobacterial CO2-Fixing Organelles
Source: PubMed Central journal article supplement (PMC5996877; doi:10.3389/fpls.2018.00739), 2018-06-05
Supplement: Presentation_1.pdf [file Presentation_1.pdf]

*Supplementary Material*

# Engineering and modulating functional cyanobacterial CO<sub>2</sub>-fixing organelles

Yi Fang<sup>1</sup>, Fang Huang<sup>1</sup>, Matthew Faulkner<sup>1</sup>, Qiuyao Jiang<sup>1</sup>, Gregory F. Dykes<sup>1</sup>, Mengru Yang<sup>1</sup>,  
and Lu-Ning Liu<sup>1\*</sup>

<sup>1</sup>Institute of Integrative Biology, University of Liverpool, Crown Street, Liverpool L69 7ZB, United Kingdom

\* **Correspondence:** Dr Lu-Ning Liu: [luning.liu@liverpool.ac.uk](mailto:luning.liu@liverpool.ac.uk)

**Supplementary Figures and Tables**

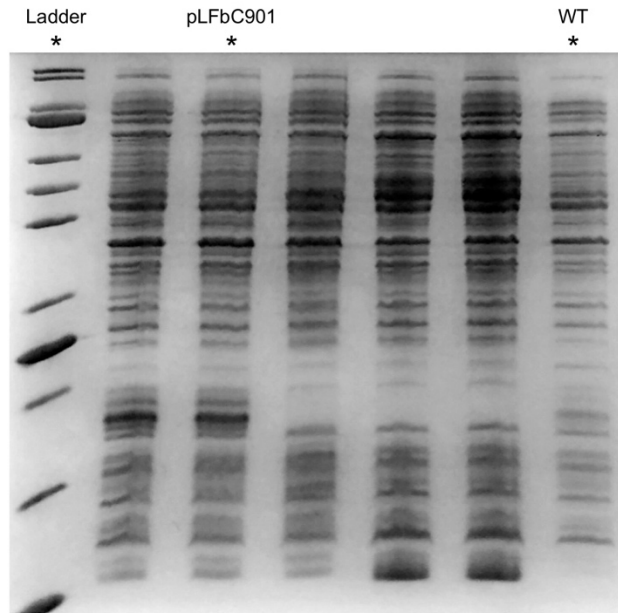

**Supplementary Figure 1. Raw SDS-PAGE gel image of the total cell extracts of the recombinant *E. coli* pLFbC901 and the *E. coli* WT cells.** The sample lanes of protein ladder, WT and pLFbC901 were selected to be shown in Figure 1C.

**A**

**CbbL** ----MAVKKYSAGVKEYRQTYWMPEYTPLDSDILACFKITPQPGVDREAAAAVAESST  
**RbcL** MPKTQSAAGYKAGVKDYKLTYYTPDYTPKDTDLLAAFRFSPQPGVPADEAGAAIAESST  
 :. \*.\*\*\*\*:\*: \*\*: \*:\*\*\* \*:\*\*\*:\*.\*\*\*:\*\*\*\* :\*.\*\*:\*\*\*\*\*

**CbbL** GTWTTVWTDLLTDMDYKGRAYRIEDVPGDDAAFYAFIAYPIDLFEEGSVVNVFTSLVGN  
**RbcL** GTWTTVWTDLLTDMDRYKGYKCYHIEPVQGEENSYFAFIAYPLDLFEEGSVTNILTSIVGN  
 \*\*\*\*\* \*\*\*:.\*:\*\* \* \*\*: :\*:\*\*\*\*:\*\*\*\*\*.\*:\*\*\*:\*\*

**CbbL** VFGFKAVRGLRLEDVRFPLAYVKTCGGPPHGIQVERDKMNKYGRPLLGCITKPKLGLSAK  
**RbcL** VFGFKAIRSLRLEDIRFPVALVKTFQGGPPHGIQVERDLLNKYGRPMLGCITKPKLGLSAK  
 \*\*\*\*\*:\*.\*\*\*\*\*:\*\*\*:\* \*\*\* \*\*\*\*\* :\*\*\*\*\*:\*\*\*\*\*\*\*\*\*\*

**CbbL** NYGRAVYECLRGGLDFTKDDENINSQPFMRWRDRFLFVQDATETAEAOQTGERKGHYLNVT  
**RbcL** NYGRAVYECLRGGLDFTKDDENINSQPFQWRDRFLFVADAIHKSQAETGEIKGHYLNVT  
 \*\*\*\*\* \*\*\*\*\* \*\* ..\*:\*\*\* \*\*\*\*\*

**CbbL** APTPEEMYKRAEFAKEIGAPIIMHDYITGGFTANTGLAKWCQDNGVLLHIHRAMHAVIDR  
**RbcL** APTCEEMKRAEFAKELGMPIIMHDFTAGFTANTTLAKWCRDNGVLLHIHRAMHAVIDR  
 \*\*\* \*\* \*\*\*\*\*:\* \*\*\*\*\*:\*.\*\*\*\*\* \*\*\*\*\*:\*\*\*\*\*\*\*\*\*\*

**CbbL** NPNHGIHFRVLTKILRLSGGDHLHTGTVVGKLEGDRASTLGWIDLLRESFIPEDRSRGIF  
**RbcL** QRNHGIHFRVLAKCLRLSGGDHLHSGTVVGKLEGDKASTLGFVDLMREDHIEADRSRGVF  
 : \*\*\*\*\*:\* \*\*\*\*\*:\*\*\*\*\*:\*\*\*\*\*:\*\*\*:\*. \* \*\*\*\*\*:\*

**CbbL** FDQDWGSM PGVFAVASGGIHVWHMPALVNI FGDDSVLQFGGGTLGHPWGNAAAGAAANRVA  
**RbcL** FTQDWASMPGVLPVASGGIHVWHMPALVEIFGDDSVLQFGGGTLGHPWGNAPGATANRVA  
 \* \*.\*\*.\*\*\*:\*.\*\*\*\*\*\*:\*\*\*\*\*:\*\*\*\*\*.\*:\*\*\*\*\*

**CbbL** LEACVEARNQGRDIEKEGKEILTAAAOHSPELKIAMETWKEIKFEFDTVDKLDTONR  
**RbcL** LEACVQARNEGRDLYREGGDILREAGKWSPELAAALDLWKEIKFEFETMDKL-----  
 \*\*\*\*\*:\*\*\*:\*\*\*: \*\*: \*\* \*.: \*\*\*\* \*: : \*\*\*\*\*:\*.\*\*\*

**B**

**CcmK2** ----MPIAVGMIETLGFPAVVEAADAMVKAARVTLVGYEKIGSGRVTVIVRGDVSEVQAS  
**CsoS1A** MADVTGIALGMIETRGLVPAIEAADAMTKAAEVRLVGRQFVGGGYVTVLVRGETGAVNAA  
**PduA** ---MQQEALGMVETKGLTAAIEAADAMVKSANVMLVGYEKIGSGLVTVIVRGDVGAVKAA  
 \*:\*\*\*:\*\* \*: .:\*\*\*\*\*.\*:\*. \* \*\* : :\*. \* \*\*\*:\*\*\*:.. \*:\*\*

**CcmK2** VSAGLDSAKRVAGGEVLSHHIIARPHENLEYVLPPIRYTEAVEQFRM  
**CsoS1A** VRAGADACERVGDG-LVAAHIIARVHSEVENILPKAPQA-----  
**PduA** TDAGAAAARN--VGEVKAVHVIPRPHTDVEKILPKGISQ-----  
 . \*\* :... \* : : \*\* \* \* :\*: \*\*

**Supplementary Figure 2. Sequence alignment of representative BMC proteins using Clustal Omega multiple sequence alignment program. (A) Sequence similarity (78%) between the Form 1B Rubisco large subunit CbbL from *H. neapolitanus* and the Form 1B Rubisco large subunit RbcL from Syn7942. (B) Sequence conservation of representative BMC shell hexamers, CcmK2 from Syn7942, CsoS1A from *H. neapolitanus* and PduA from *S. Typhimurium* (CsoS1A – CcmK2: 53%; PduA – CcmK2: 61%).**



| CyanoBase       | UniProt | Protein Description      | Mascot score | Coverage (%) | Unique peptides                                                                           |
|-----------------|---------|--------------------------|--------------|--------------|-------------------------------------------------------------------------------------------|
| Synpcc7942_1426 | Q31NB3  | Rubisco large chain RbcL | 206          | 14           | KLTYYPDYTPKD<br>KDTDLLAAFRF<br>RAVYECLRG<br>KASTLGFVDMRE<br>REDHIEADRS<br>KWSPELAAALDLWKE |
| Synpcc7942_1427 | Q31NB2  | Rubisco small chain RbcS | 178          | 42           | RFETFSYLPPLSDRQ<br>KLPLFDCKS<br>KSPQQVLDEVRE<br>RSEYGDCYIRV<br>RVAGFDNIQK                 |
| Synpcc7942_1421 | Q03511  | CcmK2                    | 155          | 40           | RVTLVGYEKI<br>RVTVIVRG<br>RGDVSEVQASVSAGLDSAKR<br>RYTEAVEQFRM                             |
| Synpcc7942_1423 | Q03513  | CcmM                     | 129          | 6            | RLSSEVITQVRS<br>RNLLAQGYRI<br>RVFEALIQDPQGPVGSACA                                         |
| Synpcc7942_0285 | Q31RK2  | CcmK4                    | 112          | 24           | RFAVNIRG<br>KTAMDAGIEAAKN<br>RLSAEGTGSGRR                                                 |

**Supplementary Table 2. Proteomic analysis of identified  $\beta$ -carboxysome proteins expressed by pLFbC901 in the whole *E. coli* cell extract.**
